# Supplementary material for: An early report: a modified porphyrin-linked metronidazole targeting intracellular Porphyromonas gingivalis in cultured oral epithelial cells
Source: PubMed Central journal article supplement (PMC5709547; doi:10.1038/ijos.2017.31), 2017-09-29
Supplement: ijos201731x1.pdf [file ijos201731x1.pdf]

## Supplementary Data

### **An early report: a modified porphyrin linked metronidazole targeting intracellular *Porphyromonas gingivalis* in cultured oral epithelial cells**

Ping Ye<sup>1,2\*</sup>, Jiho Chang<sup>1</sup>, Lin Feng Foo<sup>1</sup>, and Benjamin C-M Yap<sup>1</sup>

<sup>1</sup> Institute of Dental Research, Centre for Oral Health, Westmead Hospital, Westmead, Australia

<sup>2</sup> Affiliation of Faculty of Dentistry, the University of Sydney, Sydney, Australia

## **MATERIALS AND METHODS**

Live cell imaging analysis determined the penetration/localization of this compound (auto-fluorescence in red) for up to 4 hours. Briefly, Confluent H413 clone-1 cells ( $2 \times 10^5/\text{cm}^2$ ) grown on 8-well chamber slides (ibidi, Germany) were treated with modified porphyrin-linked metronidazole (20 and 40  $\mu\text{M}$ , dissolved in DMSO) or DMSO (0.2%) observed by Olympus Fluoview (FV) 1000 confocal system. 3D reconstructions were built up by z-stack images using 3D Olympus Fluoview software.<sup>1</sup>

## **RESULTS**

Figure S1 showed this compound was being uptake at 15 min, major located at cell surface, and then penetrating into the cells around 35 min, getting stronger expression around 1-3 h, then reducing its expression at 4 h. There was no impact of the porphyrin adducts/DMSO on cell morphology change for up to 4 h. The porphyrin adducts exhibited auto-fluorescence at different wavelengths, but fluorescence was observed to be stronger in the red range (600-650 nm) and was localized in the cytoplasm by analysis of z-stack projection images (Figure S2a) and 3D reconstruction images (Figure S2b).

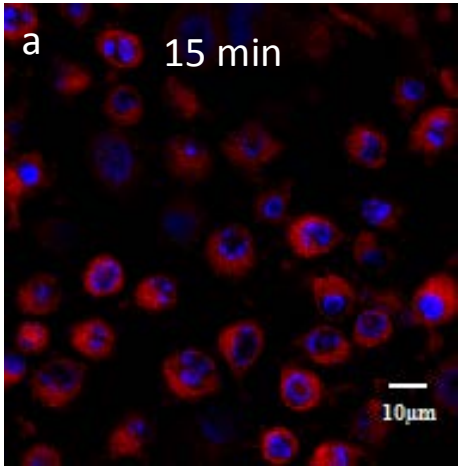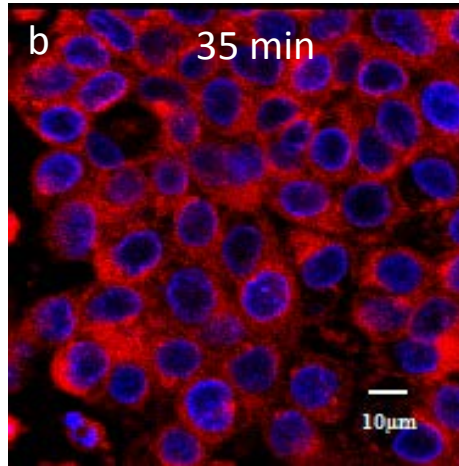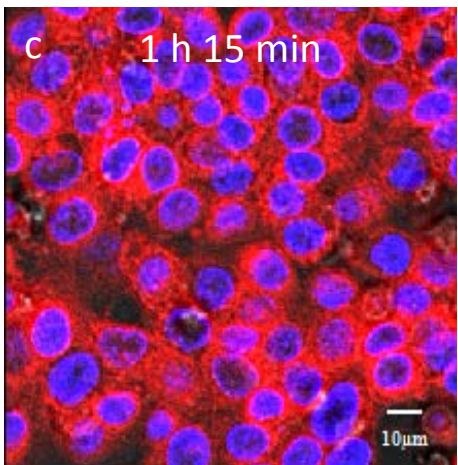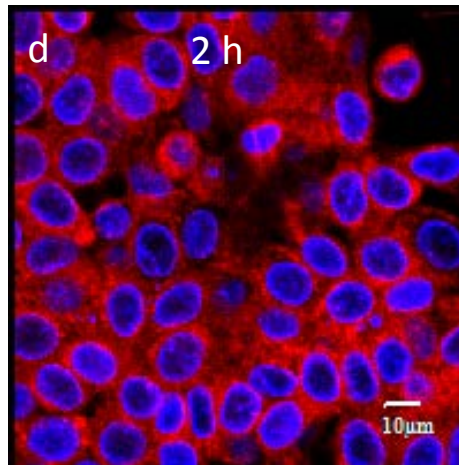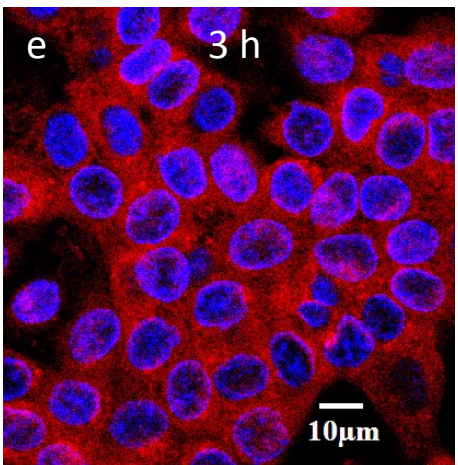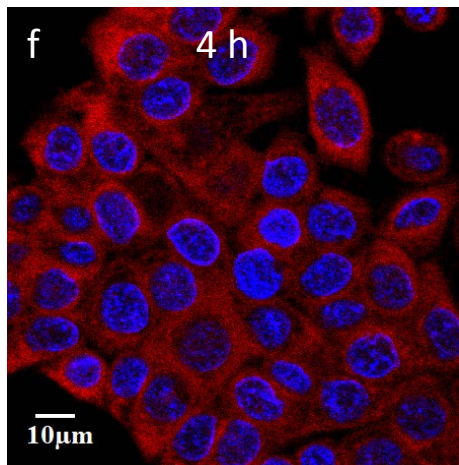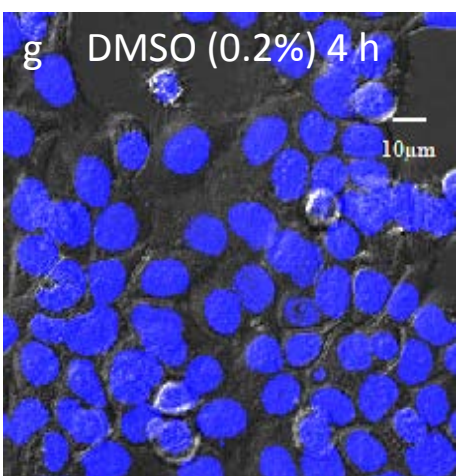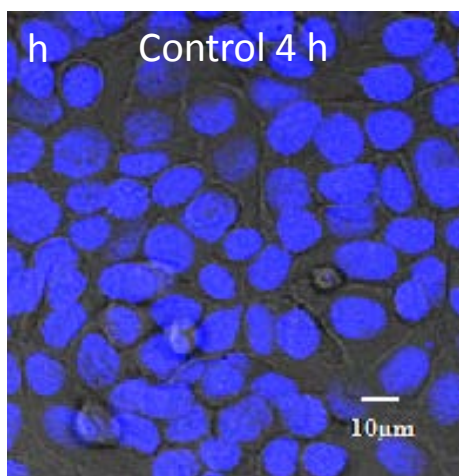

**Figure S1** Live cell imaging showed that this compound was uptake at 15 min, major located at cell surface (a), and then penetrating into the cells around 35 min (b). The compound displayed a strong expression at 1-3 h (c-e), and a reduced expression starting at 4 h (f). There was no impact of the porphyrin adducts/DMSO on cell morphology change for the experiments (g: 0.2% DMSO; h: control cells).

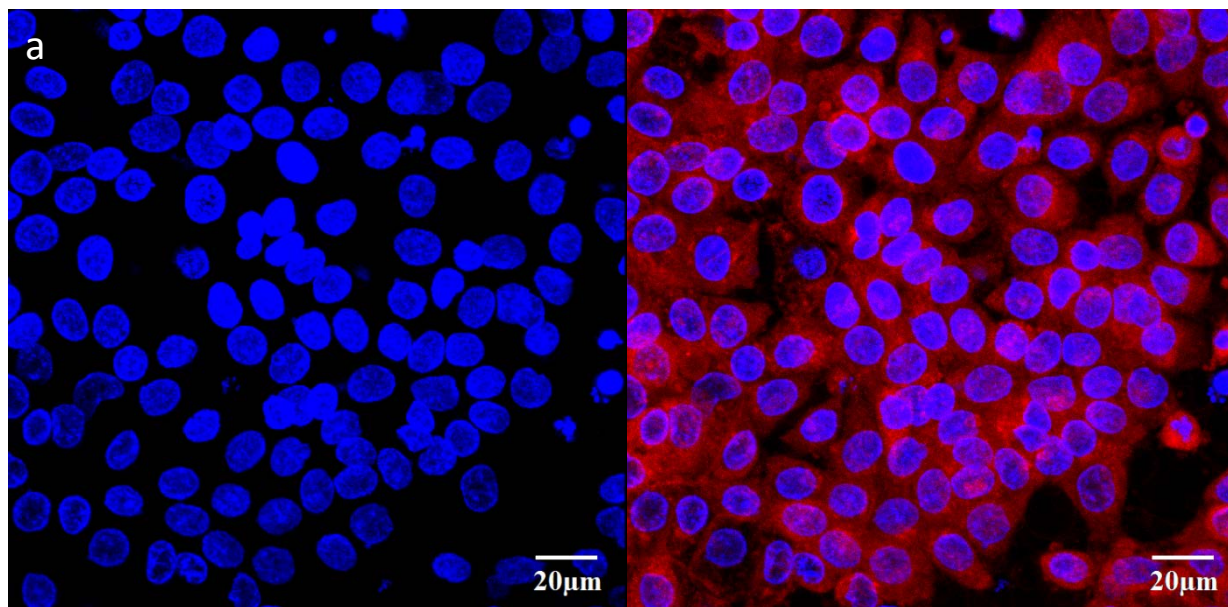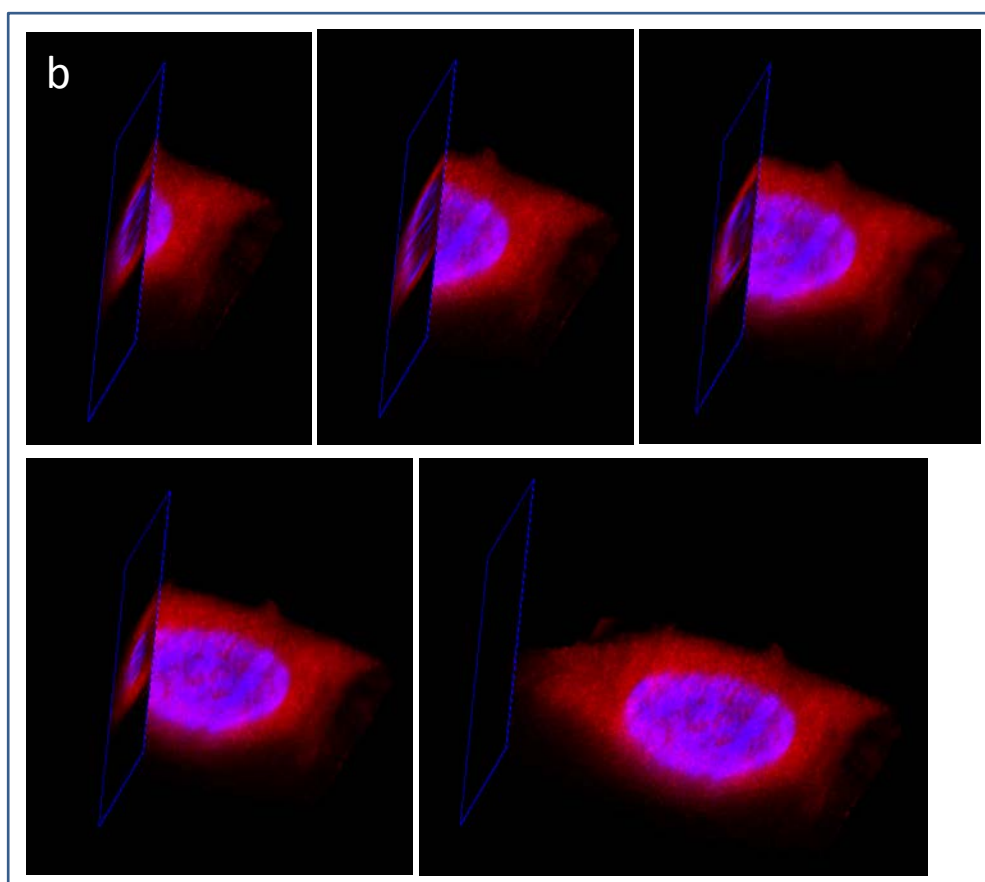

**Figure S2 (a)** Live cell imaging of z-stack projection at 3 h culture showed porphyrin-linked metronidazole adducts (in red, nuclei in blue) within the cytoplasm of epithelial H413-1 cells by confocal laser scanning microscopy. **(b)** 3D reconstruction with a series of sliced images of one single cell confirmed the compound (in red, nuclei in blue) localised in the cytoplasm.

1. Ye P, Yu H, Houshmandi M. Three/four-dimensional (3D/4D) microscopic imaging and processing in clinical dental research. *BMC Oral Health* 2016; **16**(1): 84.
